# Supplementary material for: Gelsolin suppresses gastric cancer metastasis through inhibition of PKR-p38 signaling
Source: PubMed Central journal article supplement (PMC5288199; doi:10.18632/oncotarget.10557), 2016-07-13
Supplement: oncotarget-07-53459-s001.pdf [file oncotarget-07-53459-s001.pdf]

## Gelsolin suppresses gastric cancer metastasis through inhibition of PKR-p38 signaling

### SUPPLEMENTARY FIGURES AND TABLE

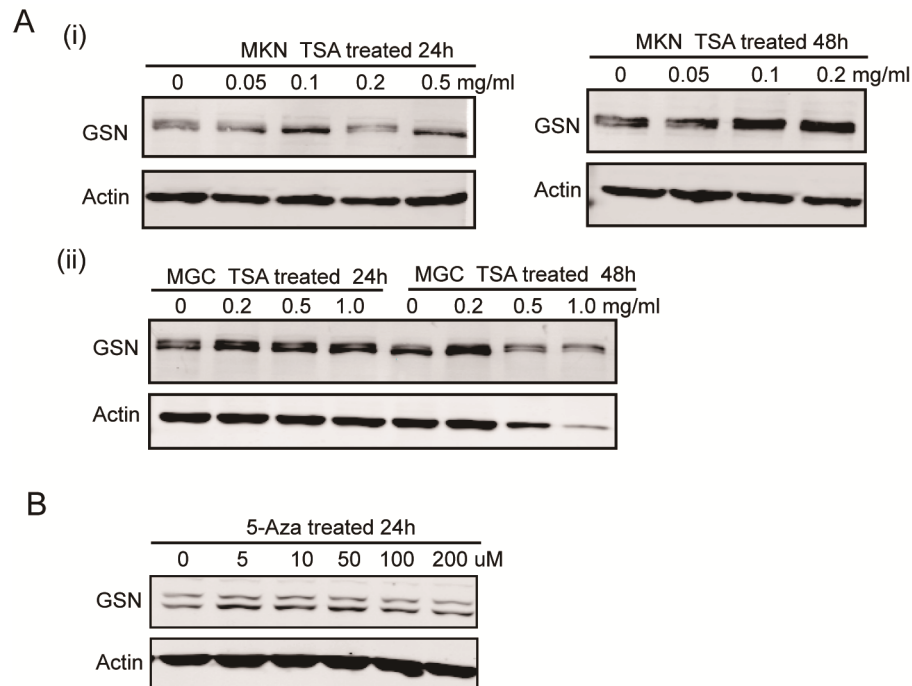

**Supplementary Figure S1: DNA methylation and histone deacetylation account for the down regulation of GSN in gastric cancer cells.** **A.**, GSN expression can be reconstituted in MKN-45 (i) and MGC-803 (ii) gastric cancer cells by treatment with the histone deacetylase inhibitor, Trichostatin A (TSA). **B.** WB test showed that the DNA methylation inhibitor, 5-aza-2'-deoxycytidine (5-Aza), can increase the GSN expression in MGC-803 gastric cancer cell. To ensure equal loading, the blots were stripped and immunoblotted with an antibody against actin.

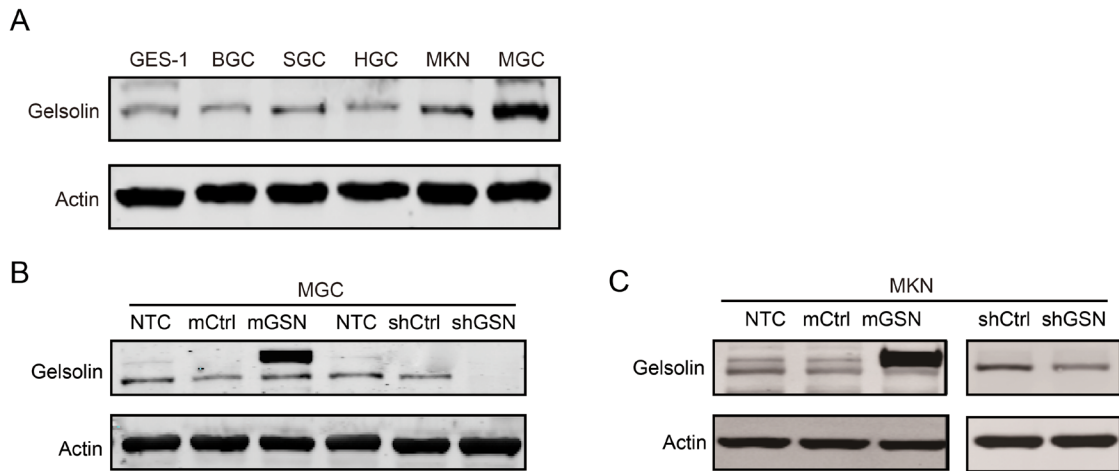

**Supplementary Figure S2: Immunoblotting analysis of gelsolin expression in gastric cancer cell lines (A). The efficiency of over expression or knockdown gelsolin in MGC (B) and MKN cell (C).**

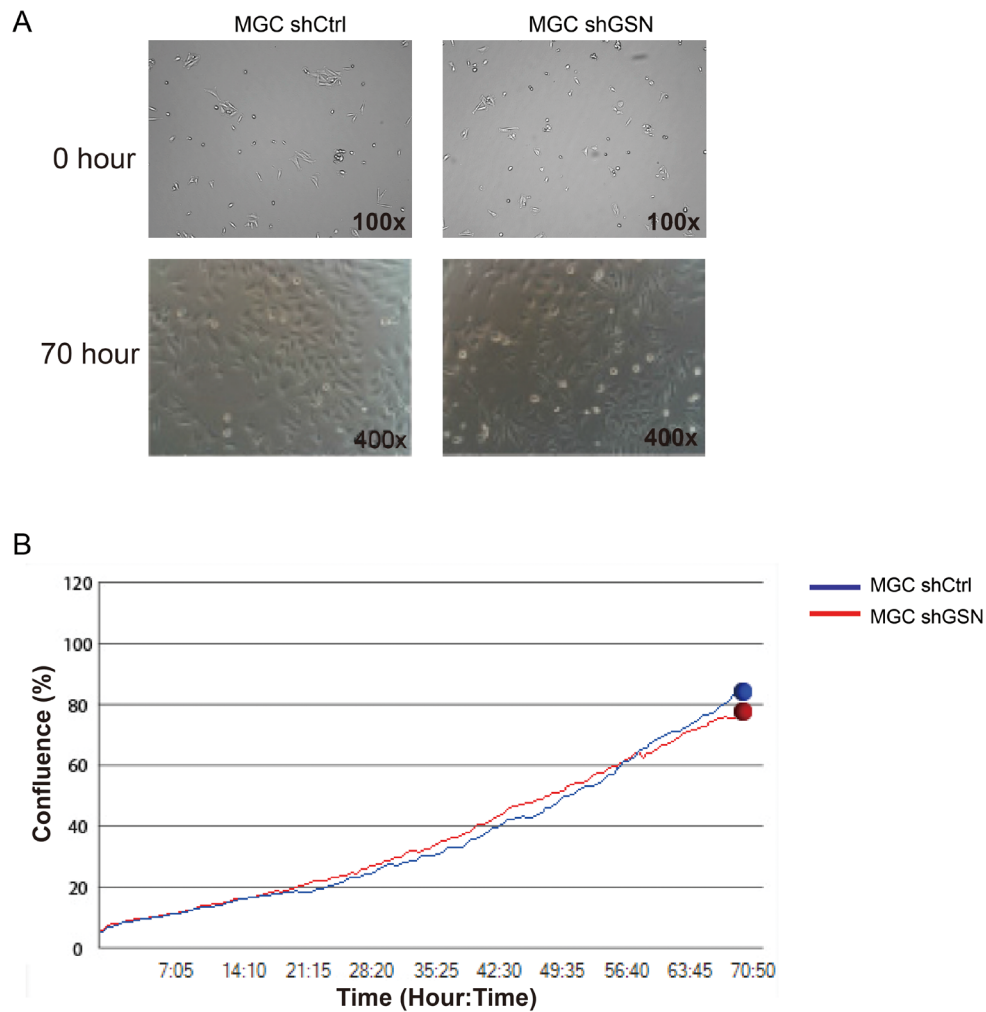

**Supplementary Figure S3: Knockdown of GSN have no effect on the growth of MGC gastric cancer cell.** **A.**, MGC cells were transfected with scramble (shCtrl) or shGSN respectively, then cultured in 6-well plate in same density. Represent phase images showed the cell density on the time of 0h and 70h. **B.**, The real-time cell proliferation of MGC-shCtrl and MGC-shGSN was observed and the cell numbers were counted by JuLi Live cell analyzer (NanoEnTek). The cell proliferation curve showed there were no significant difference in the growth of MGC-shCtrl and MGC-shGSN.

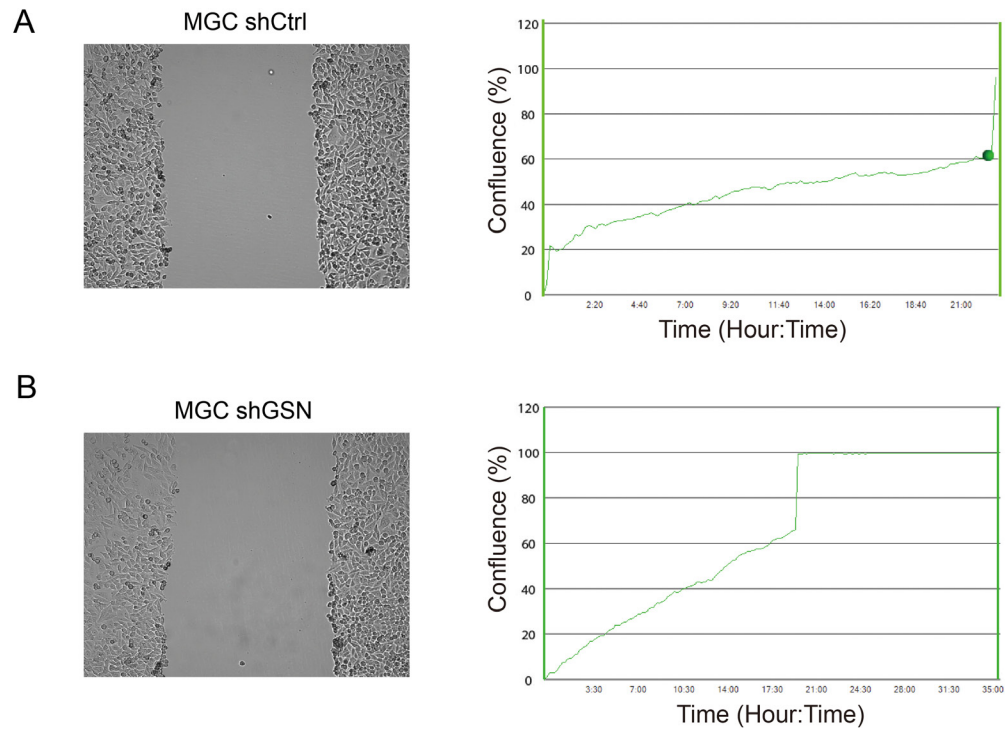

**Supplementary Figure S4: Knockdown of GSN increased the motility of MGC cell.** MGC cell were transfected with scramble (shCtrl) **A.** or shGSN **B.** respectively, then cultured in 24-well plate in same density. When the cell density were at 100% confluence, scratch assay were used to analyze the rate of wound healing. Represent phase (Left image) show the cell density on the time point of 0h. The real-time cell wound closure of MGC-shCtrl (**A**, right) and MGC-shGSN (**B**, right) cells were observed over 36 h by JuLi Live cell analyzer (NanoEnTek). The confluent curves showed that MGC-shGSN cell have faster wound closure ability than MGC-shCtrl cell.

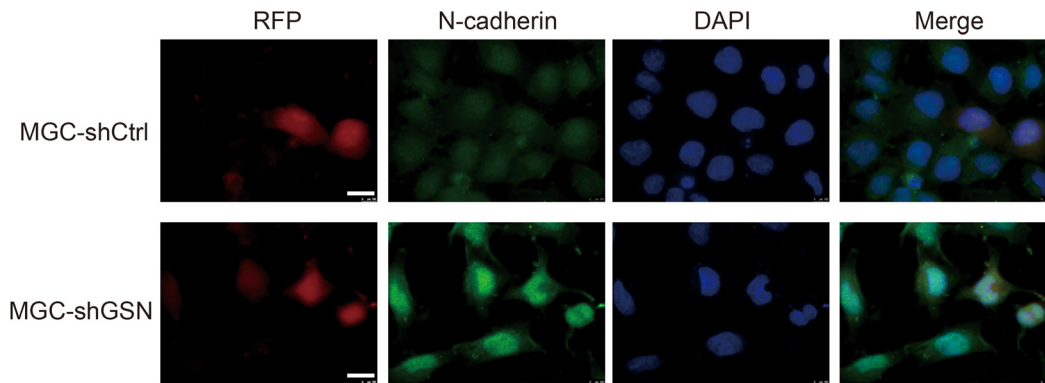

**Supplementary Figure S5: Immunofluorescence staining of N-cadherin in MGC cell with shCtrl or shGSN.** Red: stable MGC cells with shCtrl or shGSN; Green: N-cadherin; Blue: DAPI.

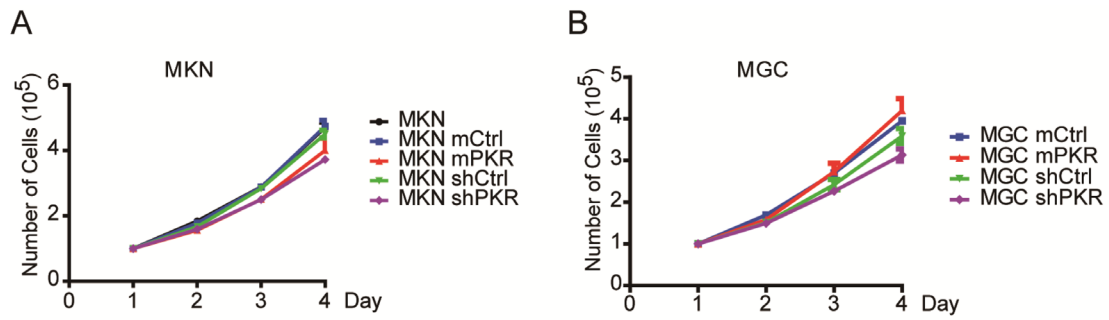

**Supplementary Figure S6: Effect of PKR on the proliferation of MGC-803 and MKN-45 gastric cancer cell lines.** Cell proliferation was determined by cell counting. There was no significant difference in the numbers of MKN-45 **A.** and MGC-803 cell **B.** with over expression or knock-down of PKR.

Supplementary Table S1: Relationship between GSN and phospho-PKR, p38 expression in gastric cancer

|                   | GSN expression |          |          | <i>P</i> value |
|-------------------|----------------|----------|----------|----------------|
|                   | All            | Positive | Negative |                |
| p-PKR expression  |                |          |          |                |
| High              | 41             | 19 (46%) | 22 (54%) | 0.01           |
| Low               | 15             | 13 (87%) | 2 (13%)  |                |
| p38 expression    |                |          |          |                |
| High              | 38             | 18 (47%) | 20 (53%) | 0.04           |
| Low               | 18             | 14 (78%) | 4 (22%)  |                |
| Metastasis status |                |          |          |                |
| Negative          | 44             | 29 (66%) | 15 (34%) | 0.02           |
| Positive          | 12             | 3 (25%)  | 9 (75%)  |                |
